# Supplementary material
Source: PubMed Central journal article supplement (PMC7045874)
Supplement: NIHMS1551845-supplement-supp-meta-analysis.pdf [file NIHMS1551845-supplement-supp-meta-analysis.pdf]

**Web-based Supplementary Material for “Exact Inference on the  
Random-Effects Model for Meta-Analyses with Few Studies”**

**Haben Michael<sup>1,\*</sup>, Suzanne Thornton<sup>2</sup>, Minge Xie<sup>2</sup>, and Lu Tian<sup>3</sup>**

<sup>1</sup>Department of Statistics, Stanford University, Stanford, CA

<sup>2</sup>Department of Statistics, Rutgers University, New Brunswick NJ

<sup>3</sup>Department of Biomedical Data Science, Stanford University

\**email*: haben.michael@stanford.edu

| K  | DL       | HE   | SJ   | ML    | REML | EB   | HS   | Bayes | Exact CI |             |             |              |       |       |       |       |       |       |       |
|----|----------|------|------|-------|------|------|------|-------|----------|-------------|-------------|--------------|-------|-------|-------|-------|-------|-------|-------|
|    |          |      |      |       |      |      |      |       | 0        | 0.5         | 1           | 2            | 4     | 8     | 16    | 32    | 1024  |       |       |
| 3  | coverage | 0.81 | 0.78 | 0.86  | 0.65 | 0.79 | 0.81 | 0.66  | 1        | 0.98        | 0.98        | <b>0.98</b>  | 0.98  | 0.98  | 0.98  | 0.98  | 0.98  | 0.98  | 0.98  |
|    | length   | 9.08 | 9.21 | 10.14 | 6.49 | 9.1  | 9.36 | 5.62  | 82.94    | 23.9        | 23.52       | <b>23.33</b> | 23.18 | 23.15 | 23.42 | 24.31 | 25.63 | 29.02 | 29.02 |
| 4  | coverage | 0.83 | 0.79 | 0.89  | 0.74 | 0.83 | 0.83 | 0.74  | 1        | 0.96        | 0.96        | <b>0.96</b>  | 0.96  | 0.96  | 0.96  | 0.96  | 0.97  | 0.97  | 0.97  |
|    | length   | 7.83 | 7.88 | 8.82  | 6.32 | 7.92 | 8.09 | 5.67  | 21.53    | 15.49       | 15.15       | <b>15.08</b> | 15.08 | 15.28 | 15.8  | 16.51 | 17.22 | 18.47 | 18.47 |
| 6  | coverage | 0.86 | 0.84 | 0.91  | 0.81 | 0.86 | 0.86 | 0.81  | 0.97     | 0.95        | <b>0.95</b> | 0.95         | 0.95  | 0.95  | 0.96  | 0.96  | 0.97  | 0.97  | 0.97  |
|    | length   | 6.82 | 6.78 | 7.55  | 6.01 | 6.82 | 6.96 | 5.6   | 10.83    | 10.04       | <b>9.82</b> | 9.83         | 9.97  | 10.29 | 10.74 | 11.18 | 11.54 | 12.01 | 12.01 |
| 8  | coverage | 0.89 | 0.86 | 0.93  | 0.86 | 0.88 | 0.89 | 0.85  | 0.97     | 0.95        | <b>0.95</b> | 0.96         | 0.96  | 0.96  | 0.97  | 0.97  | 0.97  | 0.97  | 0.97  |
|    | length   | 5.83 | 5.68 | 6.4   | 5.32 | 5.82 | 5.87 | 5.1   | 8.1      | 8.1         | <b>7.97</b> | 8.02         | 8.17  | 8.47  | 8.83  | 9.16  | 9.37  | 9.66  | 9.66  |
| 10 | coverage | 0.9  | 0.87 | 0.93  | 0.87 | 0.91 | 0.9  | 0.86  | 0.97     | 0.96        | <b>0.96</b> | 0.96         | 0.97  | 0.97  | 0.97  | 0.98  | 0.98  | 0.98  | 0.98  |
|    | length   | 5.41 | 5.3  | 5.9   | 5.05 | 5.4  | 5.45 | 4.88  | 6.81     | 6.99        | <b>6.87</b> | 6.92         | 7.09  | 7.35  | 7.65  | 7.91  | 8.07  | 8.28  | 8.28  |
| 15 | coverage | 0.94 | 0.92 | 0.96  | 0.92 | 0.93 | 0.93 | 0.92  | 0.96     | <b>0.96</b> | 0.96        | 0.96         | 0.96  | 0.98  | 0.98  | 0.99  | 0.99  | 0.99  | 0.99  |
|    | length   | 4.44 | 4.4  | 4.85  | 4.26 | 4.45 | 4.48 | 4.17  | 5.14     | <b>5.25</b> | 5.19        | 5.26         | 5.42  | 5.65  | 5.88  | 6.06  | 6.17  | 6.3   | 6.3   |
| 20 | coverage | 0.93 | 0.92 | 0.96  | 0.93 | 0.94 | 0.94 | 0.92  | 0.94     | <b>0.96</b> | 0.96        | 0.96         | 0.96  | 0.97  | 0.97  | 0.97  | 0.97  | 0.98  | 0.98  |
|    | length   | 3.89 | 3.83 | 4.21  | 3.77 | 3.89 | 3.9  | 3.71  | 4.33     | <b>4.46</b> | 4.42        | 4.5          | 4.64  | 4.84  | 5.03  | 5.17  | 5.26  | 5.36  | 5.36  |

Table 1: Simulation comparing coverage rates and lengths for 95% asymptotic and exact CIs of  $\mu$ , the grand mean. The proposed estimator, using a range of  $c_0$  values, is compared with the DerSimonian-Laird, Hedges-Olkin, Sidak-Jonkman, ML, REML, empirical bayes, and Hunter-Schmidt estimators, as well as a bayesian estimator using a typical non-informative prior. Highlighted in bold are cells corresponding to the suggested tuning parameter for the proposed estimator.

| K  | DL       | HE   | SJ   | ML   | REML | EB   | HS   | Bayes | Exact CI |       |       |       |       |       |       |       |       |       |       |       |
|----|----------|------|------|------|------|------|------|-------|----------|-------|-------|-------|-------|-------|-------|-------|-------|-------|-------|-------|
|    |          |      |      |      |      |      |      |       | 0        | 0.5   | 1     | 2     | 4     | 8     | 16    | 32    | 1024  |       |       |       |
| 2  | coverage | 0.89 | 0.89 | 0.93 | 0.83 | 0.89 | 0.89 | 0.85  | 1.00     | 1.00  | 1.00  | 1.00  | 1.00  | 1.00  | 1.00  | 1.00  | 1.00  | 1.00  | 1.00  | 1.00  |
|    | length   | 7.52 | 7.52 | 8.29 | 4.27 | 7.52 | 7.52 | 4.25  | 57.03    | 56.98 | 56.93 | 56.83 | 56.69 | 56.56 | 56.53 | 56.78 | 70.36 | 70.36 | 70.36 | 70.36 |
| 3  | coverage | 0.89 | 0.87 | 0.94 | 0.83 | 0.87 | 0.88 | 0.83  | 1.00     | 0.99  | 0.99  | 0.99  | 0.99  | 0.99  | 0.99  | 0.99  | 0.99  | 0.99  | 0.99  | 1.00  |
|    | length   | 5.80 | 6.26 | 7.30 | 4.33 | 5.72 | 6.08 | 4.25  | 64.53    | 17.90 | 17.81 | 17.76 | 17.81 | 17.99 | 18.41 | 19.12 | 21.86 | 21.86 | 21.86 | 21.86 |
| 4  | coverage | 0.92 | 0.91 | 0.96 | 0.87 | 0.91 | 0.92 | 0.87  | 1.00     | 1.00  | 1.00  | 1.00  | 1.00  | 1.00  | 1.00  | 1.00  | 1.00  | 1.00  | 1.00  | 1.00  |
|    | length   | 5.07 | 5.46 | 6.53 | 4.08 | 4.97 | 5.32 | 4.09  | 15.58    | 10.75 | 10.64 | 10.59 | 10.69 | 10.97 | 11.40 | 11.89 | 12.92 | 12.92 | 12.92 | 12.92 |
| 6  | coverage | 0.86 | 0.89 | 0.97 | 0.85 | 0.88 | 0.87 | 0.86  | 0.99     | 1.00  | 1.00  | 1.00  | 1.00  | 1.00  | 1.00  | 1.00  | 1.00  | 1.00  | 1.00  | 1.00  |
|    | length   | 4.28 | 4.42 | 5.50 | 3.76 | 4.25 | 4.42 | 3.77  | 7.55     | 6.48  | 6.44  | 6.44  | 6.48  | 6.61  | 7.06  | 7.28  | 7.58  | 7.58  | 7.58  | 7.58  |
| 8  | coverage | 0.93 | 0.91 | 0.97 | 0.92 | 0.93 | 0.92 | 0.91  | 0.99     | 0.98  | 0.98  | 0.96  | 0.96  | 0.96  | 0.96  | 0.97  | 0.97  | 0.97  | 0.97  | 0.97  |
|    | length   | 3.62 | 3.80 | 4.76 | 3.31 | 3.59 | 3.74 | 3.32  | 5.46     | 4.81  | 4.77  | 4.82  | 4.89  | 5.04  | 5.21  | 5.33  | 5.49  | 5.49  | 5.49  | 5.49  |
| 10 | coverage | 0.93 | 0.90 | 0.98 | 0.91 | 0.93 | 0.93 | 0.91  | 0.99     | 0.98  | 0.98  | 0.98  | 0.98  | 0.99  | 0.99  | 0.99  | 0.99  | 0.99  | 0.99  | 0.99  |
|    | length   | 3.39 | 3.60 | 4.44 | 3.07 | 3.34 | 3.53 | 3.16  | 4.58     | 4.29  | 4.26  | 4.34  | 4.47  | 4.65  | 4.80  | 4.92  | 5.07  | 5.07  | 5.07  | 5.07  |
| 15 | coverage | 0.95 | 0.93 | 0.98 | 0.89 | 0.93 | 0.95 | 0.91  | 0.97     | 0.97  | 0.96  | 0.96  | 0.97  | 0.97  | 0.97  | 0.97  | 0.97  | 0.97  | 0.97  | 0.97  |
|    | length   | 2.78 | 3.00 | 3.70 | 2.57 | 2.70 | 2.90 | 2.65  | 3.32     | 3.37  | 3.36  | 3.42  | 3.53  | 3.66  | 3.76  | 3.83  | 3.91  | 3.91  | 3.91  | 3.91  |
| 20 | coverage | 0.94 | 0.94 | 0.99 | 0.93 | 0.93 | 0.95 | 0.93  | 0.97     | 0.94  | 0.94  | 0.95  | 0.95  | 0.95  | 0.95  | 0.97  | 0.97  | 0.97  | 0.97  | 0.97  |
|    | length   | 2.40 | 2.48 | 3.15 | 2.27 | 2.35 | 2.44 | 2.31  | 2.79     | 2.69  | 2.70  | 2.80  | 2.91  | 3.01  | 3.09  | 3.14  | 3.21  | 3.21  | 3.21  | 3.21  |

Table 2: Comparing coverage rates and lengths for 95% asymptotic and exact CIs of  $\mu$ , the grand mean, under a misspecified model.

The proposed estimator, using a range of  $c_0$  values, is compared with the DerSimonian-Laird, Hedges-Olkin, Sidak-Jonkman, ML, REML, empirical bayes, and Hunter-Schmidt estimators, as well as a bayesian estimator using a typical non-informative prior. The true between-study distribution is a centered chi-squared distribution, which is misspecified by a Gaussian model to test the robustness of the method. The empty cells in the ‘‘Bayes’’ column occur when the R function fails to yield a valid result.

| K  |          | DL   | HE   | SJ   | ML   | REML | EB   | HS   | Bayes | Exact CI |       |       |       |       |       |       |       |       |  |  |
|----|----------|------|------|------|------|------|------|------|-------|----------|-------|-------|-------|-------|-------|-------|-------|-------|--|--|
|    |          |      |      |      |      |      |      |      |       | 0        | 0.5   | 1     | 2     | 4     | 8     | 16    | 32    | 1024  |  |  |
| 2  | coverage | 0.88 | 0.88 | 0.92 | 0.81 | 0.88 | 0.88 | 0.83 | 1.00  | 1.00     | 1.00  | 1.00  | 1.00  | 1.00  | 1.00  | 1.00  | 1.00  | 1.00  |  |  |
|    | length   | 7.62 | 7.62 | 8.42 | 4.33 | 7.62 | 7.62 | 4.26 | 60.60 | 60.55    | 60.50 | 60.42 | 60.27 | 60.14 | 60.15 | 60.34 | -Inf  | 60.34 |  |  |
| 3  | coverage | 0.91 | 0.89 | 0.96 | 0.85 | 0.90 | 0.90 | 0.85 | 1.00  | 1.00     | 1.00  | 1.00  | 1.00  | 1.00  | 1.00  | 1.00  | 1.00  | 1.00  |  |  |
|    | length   | 6.23 | 6.41 | 7.58 | 4.44 | 6.23 | 6.44 | 4.38 | 62.44 | 15.84    | 15.74 | 15.69 | 15.75 | 15.95 | 16.43 | 17.19 | 19.91 | 19.91 |  |  |
| 4  | coverage | 0.91 | 0.90 | 0.96 | 0.87 | 0.91 | 0.91 | 0.88 | 1.00  | 1.00     | 1.00  | 1.00  | 1.00  | 1.00  | 1.00  | 1.00  | 1.00  | 1.00  |  |  |
|    | length   | 5.22 | 5.75 | 6.77 | 4.13 | 5.15 | 5.60 | 4.17 | 16.06 | 9.73     | 9.66  | 9.68  | 9.77  | 10.00 | 10.37 | 10.75 | 11.64 | 11.64 |  |  |
| 6  | coverage | 0.93 | 0.92 | 0.99 | 0.90 | 0.93 | 0.93 | 0.91 | 1.00  | 0.99     | 0.99  | 0.99  | 0.99  | 0.99  | 0.99  | 0.99  | 0.99  | 0.99  |  |  |
|    | length   | 4.31 | 4.62 | 5.65 | 3.79 | 4.30 | 4.54 | 3.78 | 7.49  | 6.47     | 6.43  | 6.46  | 6.57  | 6.79  | 7.05  | 7.28  | 7.65  | 7.65  |  |  |
| 8  | coverage | 0.93 | 0.93 | 0.99 | 0.91 | 0.92 | 0.93 | 0.91 | 0.97  | 0.98     | 0.98  | 0.98  | 0.98  | 0.98  | 0.98  | 0.98  | 0.98  | 0.98  |  |  |
|    | length   | 3.67 | 3.89 | 4.84 | 3.34 | 3.65 | 3.80 | 3.36 | 5.53  | 5.12     | 5.09  | 5.17  | 5.30  | 5.51  | 5.72  | 5.88  | 6.10  | 6.10  |  |  |
| 10 | coverage | 0.92 | 0.90 | 0.98 | 0.90 | 0.91 | 0.92 | 0.90 | 0.99  | 0.96     | 0.96  | 0.95  | 0.95  | 0.95  | 0.96  | 0.96  | 0.97  | 0.97  |  |  |
|    | length   | 3.30 | 3.51 | 4.40 | 3.04 | 3.25 | 3.43 | 3.07 | 4.47  | 4.29     | 4.28  | 4.36  | 4.49  | 4.66  | 4.81  | 4.92  | 5.07  | 5.07  |  |  |
| 15 | coverage | 0.91 | 0.91 | 0.97 | 0.90 | 0.91 | 0.91 | 0.90 | 0.97  | 0.97     | 0.97  | 0.97  | 0.97  | 0.97  | 0.97  | 0.97  | 0.98  | 0.98  |  |  |
|    | length   | 2.80 | 2.93 | 3.68 | 2.63 | 2.76 | 2.87 | 2.67 | 3.34  | 3.26     | 3.25  | 3.32  | 3.43  | 3.55  | 3.66  | 3.73  | 3.81  | 3.81  |  |  |
| 20 | coverage | 0.94 | 0.92 | 0.97 | 0.92 | 0.94 | 0.93 | 0.93 | 0.95  | 0.97     | 0.97  | 0.97  | 0.97  | 0.97  | 0.98  | 0.98  | 0.98  | 0.98  |  |  |
|    | length   | 2.44 | 2.53 | 3.20 | 2.33 | 2.42 | 2.49 | 2.36 | 2.72  | 2.84     | 2.83  | 2.92  | 3.03  | 3.14  | 3.23  | 3.29  | 3.35  | 3.35  |  |  |

Table 3: Comparing coverage rates and lengths for 95% asymptotic and exact CIs of  $\mu$ , the grand mean, under a misspecified model.

The proposed estimator, using a range of  $c_0$  values, is compared with the DerSimonian-Laird, Hedges-Olkin, Sidak-Jonkman, ML, REML, empirical bayes, and Hunter-Schmidt estimators, as well as a bayesian estimator using a typical non-informative prior. The true between-study distribution is a Cauchy distribution, which is misspecified by a Gaussian model to test the robustness of the method. The empty cells in the “Bayes” column occur when the R function fails to yield a valid result.

| K  | DL       | HE   | SJ   | ML   | REML | EB   | HS   | Bayes | Exact CI |       |       |       |       |       |       |       |      |      |  |
|----|----------|------|------|------|------|------|------|-------|----------|-------|-------|-------|-------|-------|-------|-------|------|------|--|
|    |          |      |      |      |      |      |      |       | 0        | 0.5   | 1     | 2     | 4     | 8     | 16    | 32    | 1024 |      |  |
| 2  | coverage | 0.92 | 0.92 | 0.96 | 0.89 | 0.92 | 0.90 | 1.00  | 1.00     | 1.00  | 1.00  | 1.00  | 1.00  | 1.00  | 1.00  | 1.00  | 1.00 | 1.00 |  |
|    | length   | 7.30 | 7.30 | 8.20 | 4.27 | 7.30 | 4.20 | 56.93 | 56.92    | 56.90 | 56.87 | 56.83 | 56.77 | 56.79 | 57.06 | 69.08 |      |      |  |
| 3  | coverage | 0.91 | 0.90 | 0.98 | 0.86 | 0.90 | 0.89 | 1.00  | 1.00     | 1.00  | 1.00  | 1.00  | 1.00  | 1.00  | 1.00  | 1.00  | 1.00 | 1.00 |  |
|    | length   | 5.84 | 6.18 | 7.27 | 4.28 | 5.82 | 4.24 | 58.44 | 15.87    | 15.84 | 15.82 | 15.83 | 15.98 | 16.43 | 17.24 | 19.91 |      |      |  |
| 4  | coverage | 0.94 | 0.91 | 0.97 | 0.90 | 0.94 | 0.91 | 1.00  | 0.99     | 0.99  | 1.00  | 1.00  | 1.00  | 1.00  | 1.00  | 1.00  | 1.00 | 1.00 |  |
|    | length   | 4.94 | 5.39 | 6.49 | 4.00 | 4.92 | 4.02 | 14.83 | 9.22     | 9.16  | 9.15  | 9.25  | 9.46  | 9.81  | 10.20 | 11.06 |      |      |  |
| 6  | coverage | 0.94 | 0.92 | 0.98 | 0.93 | 0.93 | 0.92 | 1.00  | 0.99     | 0.99  | 0.99  | 0.99  | 0.99  | 0.99  | 0.99  | 0.99  | 0.99 | 0.99 |  |
|    | length   | 4.04 | 4.18 | 5.30 | 3.57 | 3.99 | 3.58 | 7.13  | 6.14     | 6.12  | 6.11  | 6.14  | 6.46  | 6.69  | 6.90  | 7.22  |      |      |  |
| 8  | coverage | 0.95 | 0.94 | 0.98 | 0.93 | 0.94 | 0.94 | 0.99  | 0.98     | 0.98  | 0.98  | 0.98  | 0.98  | 0.98  | 0.98  | 0.98  | 0.98 | 0.98 |  |
|    | length   | 3.50 | 3.78 | 4.76 | 3.18 | 3.46 | 3.22 | 5.22  | 4.93     | 4.92  | 4.92  | 4.96  | 5.24  | 5.42  | 5.57  | 5.77  |      |      |  |
| 10 | coverage | 0.93 | 0.92 | 0.98 | 0.92 | 0.93 | 0.92 | 0.98  | 0.98     | 0.98  | 0.98  | 0.98  | 0.98  | 0.98  | 0.98  | 0.98  | 0.98 | 0.98 |  |
|    | length   | 3.14 | 3.34 | 4.24 | 2.93 | 3.13 | 2.96 | 4.21  | 4.08     | 4.05  | 4.06  | 4.10  | 4.34  | 4.48  | 4.58  | 4.72  |      |      |  |
| 15 | coverage | 0.93 | 0.92 | 0.98 | 0.92 | 0.93 | 0.92 | 0.97  | 0.98     | 0.97  | 0.97  | 0.97  | 0.97  | 0.98  | 0.98  | 0.98  | 0.98 | 0.98 |  |
|    | length   | 2.60 | 2.80 | 3.54 | 2.45 | 2.56 | 2.49 | 3.14  | 3.06     | 3.05  | 3.07  | 3.11  | 3.21  | 3.33  | 3.43  | 3.58  |      |      |  |
| 20 | coverage | 0.95 | 0.93 | 0.99 | 0.95 | 0.95 | 0.94 | 0.97  | 0.97     | 0.97  | 0.97  | 0.98  | 0.98  | 0.98  | 0.98  | 0.98  | 0.98 | 0.98 |  |
|    | length   | 2.26 | 2.37 | 3.07 | 2.17 | 2.25 | 2.19 | 2.62  | 2.60     | 2.59  | 2.60  | 2.65  | 2.74  | 2.84  | 2.92  | 2.97  | 3.03 |      |  |

Table 4: Comparing coverage rates and lengths for 95% asymptotic and exact CIs of  $\mu$ , the grand mean, under a misspecified model.

The proposed estimator, using a range of  $c_0$  values, is compared with the DerSimonian-Laird, Hedges-Olkin, Sidak-Jonkman, ML, REML, empirical bayes, and Hunter-Schmidt estimators, as well as a bayesian estimator using a typical non-informative prior. The true between-study distribution is a centered exponential distribution, which is misspecified by a Gaussian model to test the robustness of the method. The empty cells in the “Bayes” column occur when the R function fails to yield a valid result.

| K  |          | DL    | HE    | SJ    | ML   | REML  | EB    | HS   | Bayes | Exact CI |       |       |       |       |       |       |       |       |       |  |
|----|----------|-------|-------|-------|------|-------|-------|------|-------|----------|-------|-------|-------|-------|-------|-------|-------|-------|-------|--|
|    |          |       |       |       |      |       |       |      |       | 0        | 0.5   | 1     | 2     | 4     | 8     | 16    | 32    | 1024  |       |  |
| 2  | coverage | 0.68  | 0.68  | 0.78  | 0.46 | 0.68  | 0.68  | 0.50 | 1.00  | 1.00     | 1.00  | 1.00  | 1.00  | 1.00  | 1.00  | 1.00  | 1.00  | 1.00  | 1.00  |  |
|    | length   | 10.02 | 10.02 | 10.55 | 5.22 | 10.02 | 10.02 | 4.68 | 71.73 | 71.67    | 71.62 | 71.53 | 71.39 | 71.28 | 71.30 | 71.59 | 89.39 | 89.39 | 89.39 |  |
| 3  | coverage | 0.73  | 0.70  | 0.83  | 0.60 | 0.73  | 0.73  | 0.62 | 1.00  | 0.99     | 0.99  | 0.99  | 0.99  | 0.99  | 0.99  | 0.99  | 0.98  | 0.98  | 0.98  |  |
|    | length   | 7.83  | 7.63  | 8.86  | 5.54 | 7.88  | 7.96  | 5.04 | 75.36 | 20.36    | 20.17 | 20.04 | 20.09 | 20.35 | 21.08 | 22.25 | 25.38 | 25.38 | 25.38 |  |
| 4  | coverage | 0.78  | 0.77  | 0.87  | 0.68 | 0.77  | 0.79  | 0.69 | 0.99  | 0.95     | 0.95  | 0.95  | 0.95  | 0.96  | 0.95  | 0.96  | 0.96  | 0.96  | 0.96  |  |
|    | length   | 6.91  | 7.06  | 8.10  | 5.51 | 6.95  | 7.17  | 5.11 | 20.22 | 13.73    | 13.52 | 13.47 | 13.69 | 14.14 | 14.84 | 15.50 | 16.67 | 16.67 | 16.67 |  |
| 6  | coverage | 0.83  | 0.79  | 0.90  | 0.77 | 0.83  | 0.84  | 0.76 | 0.97  | 0.95     | 0.95  | 0.95  | 0.95  | 0.96  | 0.96  | 0.96  | 0.97  | 0.97  | 0.97  |  |
|    | length   | 5.80  | 5.65  | 6.64  | 5.05 | 5.82  | 5.87  | 4.84 | 9.81  | 9.29     | 9.16  | 9.17  | 9.26  | 9.54  | 10.33 | 10.63 | 11.03 | 11.03 | 11.03 |  |
| 8  | coverage | 0.86  | 0.83  | 0.93  | 0.83 | 0.86  | 0.87  | 0.82 | 0.95  | 0.94     | 0.94  | 0.94  | 0.95  | 0.96  | 0.96  | 0.96  | 0.97  | 0.97  | 0.97  |  |
|    | length   | 5.25  | 5.13  | 5.95  | 4.83 | 5.29  | 5.32  | 4.61 | 7.17  | 7.06     | 6.99  | 7.03  | 7.17  | 7.43  | 8.06  | 8.27  | 8.54  | 8.54  | 8.54  |  |
| 10 | coverage | 0.88  | 0.85  | 0.93  | 0.85 | 0.89  | 0.89  | 0.85 | 0.97  | 0.93     | 0.94  | 0.94  | 0.94  | 0.96  | 0.97  | 0.97  | 0.97  | 0.97  | 0.97  |  |
|    | length   | 4.80  | 4.65  | 5.39  | 4.47 | 4.80  | 4.83  | 4.35 | 6.13  | 6.02     | 5.98  | 6.04  | 6.17  | 6.40  | 6.66  | 6.89  | 7.04  | 7.22  | 7.22  |  |
| 15 | coverage | 0.91  | 0.90  | 0.95  | 0.90 | 0.92  | 0.92  | 0.90 | 0.95  | 0.96     | 0.96  | 0.96  | 0.97  | 0.97  | 0.98  | 0.98  | 0.98  | 0.98  | 0.98  |  |
|    | length   | 3.99  | 3.90  | 4.45  | 3.83 | 4.01  | 4.01  | 3.75 | 4.59  | 4.71     | 4.69  | 4.75  | 4.89  | 5.08  | 5.43  | 5.53  | 5.64  | 5.64  | 5.64  |  |
| 20 | coverage | 0.94  | 0.91  | 0.97  | 0.93 | 0.93  | 0.93  | 0.92 | 0.96  | 0.95     | 0.94  | 0.95  | 0.96  | 0.97  | 0.98  | 0.98  | 0.98  | 0.98  | 0.98  |  |
|    | length   | 3.48  | 3.40  | 3.87  | 3.37 | 3.48  | 3.49  | 3.33 | 3.81  | 3.99     | 3.96  | 4.02  | 4.15  | 4.33  | 4.50  | 4.63  | 4.70  | 4.79  | 4.79  |  |

Table 5: Comparing coverage rates and lengths for 95% asymptotic and exact CIs of  $\mu$ , the grand mean, under a misspecified model.

The proposed estimator, using a range of  $c_0$  values, is compared with the DerSimonian-Laird, Hedges-Olkin, Sidak-Jonkman, ML, REML, empirical bayes, and Hunter-Schmidt estimators, as well as a bayesian estimator using a typical non-informative prior. The true between-study distribution is a uniform distribution, which is misspecified by a Gaussian model to test the robustness of the method. The empty cells in the ‘‘Bayes’’ column occur when the R function fails to yield a valid result.

| Study        | K  | DL        | HE         | SJ         | ML        | REML      | EB         | HS        | Bayes       | Permutation | Proposal   |
|--------------|----|-----------|------------|------------|-----------|-----------|------------|-----------|-------------|-------------|------------|
| lumbar spine | 27 | 0.83-1.68 | 0.85-1.3   | 0.75-1.83  | 0.82-1.72 | 0.81-1.74 | 0.80-1.75  | 0.85-1.66 | 0.76-1.79   | 0.79-1.65   | 0.79-1.73  |
| total hip    | 6  | 0.50-1.85 | 0.56-1.74  | 0.51-1.83  | 0.54-1.77 | 0.50-1.85 | 0.52-1.82  | 0.56-1.73 | 0.21-2.32   | 0.00-2.30   | 0.23-2.14  |
| forearm      | 5  | 0.21-3.38 | -0.22-4.15 | -0.14-4.02 | 0.47-2.58 | 0.26-3.25 | -0.04-3.86 | 0.31-3.12 | -0.72-3.70  | *           | -0.49-4.16 |
| total body   | 3  | 0.27-1.78 | 0.03-2.11  | 0.07-2.06  | 0.28-1.76 | 0.09-2.03 | 0.06-2.08  | 0.38-1.55 | -8.27-10.54 | *           | -0.78-2.83 |

Table 6: Random effects meta-analyses of the effect of calcium supplements on percentage change in bone mineral density (Tai et al. (2015), Figs. 1, 3, and 7). The meta-analyses were carried out using the DerSimonian-Laird, Hedges, Hunter-Schmidt, Sidik-Jonkman, ML, REML, and empirical Bayes estimators; a bayesian estimator with a non-informative prior; the permutation test of Wang and Tian (2017), applicable to meta-analyses with 6 or more studies; and the proposed exact method. A nominal 95% CI is reported. On the two smaller meta-analyses ( $K = 3, 5$ ) the proposed exact method fails to reject the null of no change, whereas most of the other estimators reject the null (except for Bayes, Sidik-Jonkman, empirical Bayes and Hunter-Schmidt methods). The Hedges, Sidik-Jonkman, and Bayes estimators fail to reject the null in the meta analysis for forearm with  $K = 5$ . The CI based on the Bayes method is very wide in the meta analysis for total body with  $K = 3$ , a potential indication of its failure.

## References

- Tai, V., Leung, W., Grey, A., Reid, I. R., and Bolland, M. J. (2015). Calcium intake and bone mineral density: systematic review and meta-analysis. *BMJ* **351**, h4183.
- Wang, Y. and Tian, L. (2017). An efficient numerical algorithm for exact inference in meta analysis. *Journal of Statistical Computation and Simulation* page under review.
